# Supplementary material for: Long COVID and Subjective Wellbeing among U.S. Working-Age Adults
Source: Research Square preprint supplement (doi:10.21203/rs.3.rs-9707617/v1), 2026-06-08
Supplement: Supplementary file 1 [file a791720269a6f059d460b540.docx]

| **Table** **1** Summary Statistics: Percentages, Means, and 95% Confidence Intervals | | | |
| --- | --- | --- | --- |
|  | Full sample | Males | Females |
| Outcomes |  |  |  |
| Life satisfaction scale (0-1) | 0.551 (0.545,0.558) | 0.553 (0.544,0.563) | 0.549 (0.540,0.559) |
| Happy | 83.7% (82.8%,84.7%) | 83.8% (82.3%,85.2%) | 83.7% (82.4%,85.0%) |
| Hopeful for the future | 72.1% (70.9%,73.3%) | 69.2% (67.3%,71%) | 75.2% (73.6%,76.7%) |
| Exposures |  |  |  |
| Any COVID infection* | 59.3% (58.0%,60.7%) | 55.9% (53.9%,57.8%) | 63.0% (61.2%,64.9%) |
| Any long COVID | 38.8% (37.5%,40.2%) | 34.7% (32.8%,36.6%) | 43.1% (41.2%,45.0%) |
| Number of reported symptoms (0-8) | 1.569 (1.505,1.632) | 1.350 (1.264,1.437) | 1.798 (1.704,1.892) |
| Reporting symptoms of: |  |  |  |
| tiredness or fatigue | 27.5% (26.2%,28.7%) | 23.4% (21.8%,25.1%) | 31.7% (29.9%,33.5%) |
| difficulty thinking | 20.7% (19.6%,21.8%) | 16.3% (14.8%,17.8%) | 25.4% (23.8%,27.0%) |
| difficulty breathing | 18.2% (17.2%,19.3%) | 16.3% (14.8%,17.7%) | 20.3% (18.9%,21.8%) |
| joint or muscle pain | 22.8% (21.6%,23.9%) | 20.4% (18.9%,22%) | 25.2% (23.6%,26.9%) |
| heart palpitations or chest pain | 13.6% (12.6%,14.5%) | 11.8% (10.4%,13.2%) | 15.4% (14.2%,16.7%) |
| dizziness on standing | 17.9% (16.9%,18.9%) | 15.0% (13.7%,16.3%) | 20.9% (19.4%,22.4%) |
| depression or anxiety | 21.6% (20.5%,22.8%) | 18.8% (17.2%,20.3%) | 24.7% (23.1%,26.3%) |
| symptoms worse on exertion | 14.6% (13.6%,15.5%) | 13.1% (11.7%,14.4%) | 16.1% (14.8%,17.5%) |
| Covariates |  |  |  |
| Female | 48.8% (47.4%,50.1%) |  |  |
| Age | 40.6 (40.2,40.9) | 42.0 (41.4,42.5) | 39.1 (38.6,39.6) |
| Education |  |  |  |
| Less than college | 31.5% (30.3%,32.8%) | 30.1% (28.3%,31.9%) | 33.1% (31.4%,34.7%) |
| 1-2 years college | 34.6% (33.3%,36.0%) | 33.2% (31.3%,35.0%) | 36.2% (34.3%,38.1%) |
| College degree or more | 33.9% (32.6%,35.3%) | 36.8% (34.9%,38.7%) | 30.9% (29.0%,32.7%) |
| Race other than white | 30.8% (29.5%,32.2%) | 25.6% (23.7%,27.4%) | 36.4% (34.5%,38.3%) |
| Employment Status |  |  |  |
| Employed | 76.0% (75.0%,77.0%) | 82.6% (81.4%,83.8%) | 69.1% (67.5%,70.8%) |
| Unemployed | 6.9% (6.4%,7.5%) | 5.4% (4.8%,6.0%) | 8.5% (7.7%,9.4%) |
| Not in labor force | 17.0% (16.1%,18.0%) | 12.0% (10.9%,13.1%) | 22.4% (20.9%,23.9%) |
| Children in household | 38.7% (37.3%,40.1%) | 35.6% (33.7%,37.5%) | 41.9% (40.0%,43.8%) |
| Marital Status |  |  |  |
| Couple | 60.3% (59.1%,61.6%) | 60.3% (58.5%,62.2%) | 60.3% (58.6%,62.1%) |
| Divorced or separated | 7.9% (7.3%,8.6%) | 7.8% (6.8%,8.7%) | 8.1% (7.4%,8.9%) |
| Widowed | 1.5% (1.2%,1.7%) | 1.2% (0.9%,1.6%) | 1.7% (1.4%,2.0%) |
| Never married | 30.3% (29.1%,31.4%) | 30.7% (29.0%,32.3%) | 29.8% (29.0%,31.4%) |
| 2020 Presidential Vote |  |  |  |
| Voted for Trump 2020 | 34.3% (33.0%,35.6%) | 39.2% (37.3%,41.1%) | 29.2% (27.4%,31.0%) |
| Voted for Biden 2020 | 38.3% (37.0%,39.7%) | 40.3% (38.4%,42.3%) | 36.2% (34.3%,38.1%) |
| Voted for other candidate/did not vote | 27.4% (26.2%,28.6%) | 20.5% (19.0%,22.1%) | 34.6% (32.8%,36.4%) |
| Metro status of county of residence |  |  |  |
| Large metro | 56.7% (55.4%,58.0%) | 59.0% (57.2%,60.9%) | 54.3% (52.4%,56.1%) |
| Midsize metro | 17.9% (16.9%,18.9%) | 17.3% (15.9%,18.7%) | 18.5% (17.1%,20.0%) |
| Small metro | 11.0% (10.2%,11.8%) | 10.0% (9.0%,11.1%) | 12.0% (10.8%,13.2%) |
| Nonmetro | 14.4% (13.6%,15.1%) | 13.6% (12.6%,14.7%) | 15.2% (14.1%,16.2%) |
| Survey Year=2024 | 49.8% (48.4%,51.2%) | 50.1% (48.1%,52%) | 49.5% (47.6%,51.5%) |
| Notes: Means and confidence intervals for binary variables reported as percentages. *Any COVID infection signifies that the respondent tested positive for coronavirus, suspected they had coronavirus based on symptoms but did not take a test to confirm, suspected they had coronavirus based on symptoms but tested negative, or received medical care or were hospitalized because of coronavirus | | | |
